# Supplementary material for: Antibiotics in Crab Ponds of Lake Guchenghu Basin, China: Occurrence, Temporal Variations, and Ecological Risks
Source: PubMed Central journal article supplement (PMC5877093; doi:10.3390/ijerph15030548), 2018-03-19
Supplement: ijerph-15-00548-s001.pdf [file ijerph-15-00548-s001.pdf]

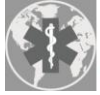

*Supplementary information*

# **Antibiotics in the Crab Ponds of Lake Guchenghu Basin, China: Occurrence, Temporal Variations and Ecological Risks**

**Wenxia Wang<sup>1,2</sup>, Xiaohong Gu<sup>1,\*</sup>, Lijun Zhou<sup>1</sup>, Huihui Chen<sup>1</sup>, Qingfei Zeng<sup>1</sup>, Zhigang Mao<sup>1</sup>**

<sup>1</sup> State Key Laboratory of Lake Science and Environment, Nanjing Institute of Geography and Limnology, Chinese Academy of Sciences, Nanjing 210008, China; wangwenxia00@163.com (W.W.); smilingapplewx@163.com (L.Z.); hhchen@niglas.ac.cn (H.C.); qfzeng@niglas.ac.cn (Q.Z.); zgmao@niglas.ac.cn (Z.M.)

<sup>2</sup> University of Chinese Academy of Sciences, Beijing 100049, China

\* Correspondence: xhgu@niglas.ac.cn; Tel.: +86-025-8688-2006

**Table S1** Details of antibiotics and their MRM parameters in RRLC-MS/MS

| Class                     | Compound                                                             | Abbr <sup>a</sup>  | CAS          | Supplier        | R.T. <sup>b</sup><br>(min) | MRM-transitions <sup>c</sup> | Fragmentor<br>(V) | CE <sup>d</sup><br>(eV) |
|---------------------------|----------------------------------------------------------------------|--------------------|--------------|-----------------|----------------------------|------------------------------|-------------------|-------------------------|
| <b>ESI+</b>               |                                                                      |                    |              |                 |                            |                              |                   |                         |
| <b>Sulfonamides</b>       |                                                                      | <b>SAs</b>         |              |                 |                            |                              |                   |                         |
|                           | Sulfacetamide                                                        | SCT                | 144-80-9     | Dr.Ehrenstorfer | 0.79                       | <u>215→91.8</u>              | 40                | 28                      |
|                           |                                                                      |                    |              |                 |                            | 215→155.9                    | 40                | 14                      |
|                           | Sulfachloryridazine                                                  | SCP                | 80-32-0      | Dr.Ehrenstorfer | 2.79                       | <u>284.8→155.8</u>           | 40                | 19                      |
|                           |                                                                      |                    |              |                 |                            | 284.8→107.9                  | 40                | 32                      |
|                           | Sulfadiazine                                                         | SDZ                | 68-35-9      | Dr.Ehrenstorfer | 0.91                       | <u>250.9→155.7</u>           | 40                | 20                      |
|                           |                                                                      |                    |              |                 |                            | 250.9→92                     | 40                | 32                      |
|                           | Sulfadoxine                                                          | SDO                | 2447-57-6    | Dr.Ehrenstorfer | 3.51                       | <u>310.9→155.9</u>           | 60                | 26                      |
|                           |                                                                      |                    |              |                 |                            | 310.9→107.9                  | 60                | 33                      |
|                           | Sulfadimethoxine                                                     | SDM                | 122-11-2     | Dr.Ehrenstorfer | 5.86                       | <u>310.8→155.9</u>           | 100               | 27                      |
|                           |                                                                      |                    |              |                 |                            | 310.8→107.9                  | 100               | 33                      |
|                           | Sulfamethazine                                                       | SMZ                | 57-68-1      | Dr.Ehrenstorfer | 1.83                       | <u>279→185.9</u>             | 75                | 23                      |
|                           |                                                                      |                    |              |                 |                            | 279→155.9                    | 75                | 25                      |
|                           | Sulfathiazole                                                        | STZ                | 72-14-0      | Dr.Ehrenstorfer | 1.06                       | <u>256→155.8</u>             | 90                | 18                      |
|                           |                                                                      |                    |              |                 |                            | 256→91.8                     | 90                | 30                      |
|                           | Sulfamethoxazole                                                     | SMX                | 723-46-6     | Dr.Ehrenstorfer | 3.42                       | <u>253.9→155.9</u>           | 90                | 22                      |
|                           |                                                                      |                    |              |                 |                            | 253.9→107.9                  | 90                | 30                      |
|                           | Sulfamethoxazole-D <sub>4</sub> (IS) <sup>e</sup> SMX-D <sub>4</sub> |                    | 1020719-86-1 | Dr.Ehrenstorfer | 3.36                       | <u>258.1→159.9</u>           | 90                | 20                      |
|                           |                                                                      |                    |              |                 |                            | 258.1→111.9                  | 90                | 32                      |
|                           | Sulfamerazine                                                        | SMR                | 127-79-7     | Dr.Ehrenstorfer | 1.31                       | <u>264.8→92.1</u>            | 70                | 34                      |
|                           |                                                                      |                    |              |                 |                            | 264.8→108.2                  | 70                | 33                      |
|                           | Sulfamerazine-D <sub>4</sub> (IS)                                    | SMR-D <sub>4</sub> |              | TRC             | 1.28                       | <u>269→159.9</u>             | 70                | 21                      |
|                           |                                                                      |                    |              |                 |                            | 269→109.8                    | 70                | 27                      |
|                           | Sulfamonomethoxine                                                   | SMM                | 1220-83-3    | Dr.Ehrenstorfer | 2.7                        | <u>281.2→155.8</u>           | 110               | 24                      |
|                           |                                                                      |                    |              |                 |                            | 281.2→107.8                  | 110               | 31                      |
|                           | Sulfapyridine                                                        | SPD                | 144-83-2     | Dr.Ehrenstorfer | 1.45                       | <u>249.9→155.9</u>           | 60                | 21                      |
|                           |                                                                      |                    |              |                 |                            | 249.9→92.1                   | 60                | 33                      |
|                           | Sulfaquinoxaline                                                     | SQX                | 59-40-5      | Dr.Ehrenstorfer | 6.11                       | <u>300.9→91.8</u>            | 90                | 31                      |
|                           |                                                                      |                    |              |                 |                            | 301.3→107.9                  | 90                | 32                      |
|                           | Sulfisoxazole                                                        | SX                 | 127-69-5     | Dr.Ehrenstorfer | 4.15                       | <u>268→156.0</u>             | 90                | 17                      |
|                           |                                                                      |                    |              |                 |                            | 268→112.9                    | 90                | 21                      |
| <b>diaminopyrimidines</b> | Trimethoprim                                                         | TMP                | 738-70-5     | Dr.Ehrenstorfer | 1.71                       | <u>291.1→122.9</u>           | 150               | 31                      |
|                           |                                                                      |                    |              |                 |                            | 291.2→230.1                  | 150               | 31                      |
|                           | Trimethoprim-D <sub>3</sub> (IS)                                     | TMP-D <sub>3</sub> |              | TRC             | 1.66                       | <u>294.4→123.1</u>           | 150               | 30                      |
|                           |                                                                      |                    |              |                 |                            | 294.4→230.0                  | 150               | 47                      |
| <b>Tetracyclines</b>      |                                                                      | <b>TCs</b>         |              |                 |                            |                              |                   |                         |
|                           | Chlortetracycline                                                    | CTC                | 57-62-5      | Dr.Ehrenstorfer | 5.08                       | <u>479→444</u>               | 90                | 27                      |
|                           |                                                                      |                    |              |                 |                            | 479→462.1                    | 90                | 23                      |
|                           | Doxycycline                                                          | DC                 | 564-25-0     | Dr.Ehrenstorfer | 6.5                        | <u>445→428.1</u>             | 155               | 22                      |
|                           |                                                                      |                    |              |                 |                            | 445→410                      | 155               | 32                      |
|                           | Thiabendazole-D <sub>4</sub> (IS)                                    | TBD-D <sub>4</sub> | 71535-97-2   | TRC             | 1.09                       | <u>205.9→134.9</u>           | 180               | 45                      |
|                           |                                                                      |                    |              |                 |                            | 205.9→178.9                  | 180               | 35                      |
|                           | Oxytetracycline                                                      | OTC                | 79-57-2      | Dr.Ehrenstorfer | 1.94                       | <u>461.1→426.1</u>           | 80                | 25                      |
|                           |                                                                      |                    |              |                 |                            | 461.1→443.1                  | 80                | 17                      |
|                           | Tetracycline                                                         | TC                 | 60-54-8      | Dr.Ehrenstorfer | 2.47                       | <u>445.1→410.0</u>           | 80                | 26                      |
|                           |                                                                      |                    |              |                 |                            | 445.1→426.8                  | 80                | 17                      |
|                           | Tetracycline-D <sub>6</sub> (IS)                                     | TC-D <sub>6</sub>  |              | TRC             | 2.46                       | <u>451.3→416</u>             | 65                | 26                      |
|                           |                                                                      |                    |              |                 |                            | 451.3→114                    | 65                | 16                      |

| Class                   | Compound                          | Abbr                                              | CAS                                 | Supplier        | R.T.<br>(min)   | MRM-transitions                   | Fragmentor<br>(V)                 | CE <sup>d</sup><br>(eV) |          |
|-------------------------|-----------------------------------|---------------------------------------------------|-------------------------------------|-----------------|-----------------|-----------------------------------|-----------------------------------|-------------------------|----------|
| <b>Fluoroquinolones</b> |                                   | FQs                                               |                                     |                 |                 | <u>331.9→314</u>                  | 95                                | 26                      |          |
|                         | Ciprofloxacin                     | CFX                                               | 85721-33-1                          | Dr.Ehrenstorfer | 2.14            | 331.9→288.1<br><u>340.1→322</u>   | 95                                | 24<br>30                |          |
|                         | Ciprofloxacin-D <sub>8</sub> (IS) | CFX-D <sub>8</sub>                                |                                     | Dr.Ehrenstorfer | 2.12            | 340.1→296.1<br><u>358→340.1</u>   | 95                                | 26<br>31                |          |
|                         | Danofloxacin                      | DAN                                               | 112398-08-0                         | Dr.Ehrenstorfer | 2.64            | 358→314<br><u>400.2→356</u>       | 90                                | 25<br>24                |          |
|                         | Difloxacin                        | DIF                                               | 98106-17-3                          | Dr.Ehrenstorfer | 3.96            | 400.2→381.9<br><u>360→316.2</u>   | 90                                | 27<br>27                |          |
|                         | Enrofloxacin                      | EFX                                               | 93106-60-6                          | Dr.Ehrenstorfer | 2.9             | 360→342<br><u>365.1→321.1</u>     | 100                               | 28<br>36                |          |
|                         | Enrofloxacin-D <sub>5</sub> (IS)  | EFX- D <sub>5</sub>                               |                                     | Dr.Ehrenstorfer | 2.87            | 365.1→347.1<br><u>370.1→326</u>   | 70                                | 30<br>25                |          |
|                         | Fleroxacin                        | FL                                                | 79660-72-3                          | Dr.Ehrenstorfer | 1.91            | 370.1→268.9<br><u>320→301.8</u>   | 115                               | 36<br>26                |          |
|                         | Norfloxacin                       | NFX                                               | 70458-96-7                          | Dr.Ehrenstorfer | 1.93            | 320→276<br><u>351.8→265</u>       | 120                               | 23<br>30                |          |
|                         | Lomefloxacin                      | LFX                                               | 98079-51-7                          | Dr.Ehrenstorfer | 2.52            | 351.8→308<br><u>363→72</u>        | 90                                | 22<br>26                |          |
|                         | Marbofloxacin                     | MAR                                               | 115550-35-1                         | Dr.Ehrenstorfer | 1.64            | 363→319.9<br><u>362→261</u>       | 95                                | 21<br>35                |          |
|                         | Ofloxacin                         | OFX                                               | 82419-36-1                          | Dr.Ehrenstorfer | 1.97            | 362→318.1<br><u>334→290</u>       | 124                               | 26<br>26                |          |
|                         | Pefloxacin                        | PEF                                               | 70458-92-3                          | Dr.Ehrenstorfer | 2.59            | 334→316<br><u>386.1→368</u>       | 120                               | 26<br>27                |          |
|                         | Sarafloxacin                      | SAR                                               | 98105-99-8                          | Dr.Ehrenstorfer | 3.79            | 386.1→342.1<br><u>263.3→129.0</u> | 140                               | 26<br>27                |          |
|                         | Carbadox                          | CAR                                               | 1791337                             | Dr.Ehrenstorfer | 1.51            | 263.3→231.1                       | 68                                | 17                      |          |
|                         | <b>Macrolides</b>                 |                                                   | MLs                                 |                 |                 |                                   |                                   |                         |          |
|                         |                                   | Azithromycin                                      | ATM                                 | 830905-01-5     | Dr.Ehrenstorfer | 7.59                              | <u>749.5→158.2</u><br>749.5→591.5 | 64                      | 40<br>30 |
|                         |                                   | Clarithromycin                                    | CTM                                 | 81103-11-9      | Dr.Ehrenstorfer | 7.59                              | <u>748.9→158.2</u><br>748.9→590.6 | 95                      | 37<br>29 |
|                         |                                   | Erythromycin-H <sub>2</sub> O                     | ETM-H <sub>2</sub> O                | 23893-13-2      | TRC             | 7.44                              | <u>716.6→158.3</u><br>716.6→558.5 | 85                      | 42<br>21 |
|                         |                                   | Erythromycin- <sup>13</sup> C-D <sub>3</sub> (IS) | ETM- <sup>13</sup> C-D <sub>3</sub> |                 | TRC             | 7.44                              | <u>720.7→162.4</u><br>720.7→562.5 | 97                      | 42<br>22 |
| Leucomycin              |                                   | LCM                                               | 1392-21-8                           | Dr.Ehrenstorfer | 7.46            | <u>772.7→109.1</u><br>772.7→174.2 | 132                               | 63<br>44                |          |
| Oleandomycin            |                                   | ODM                                               | 3922-90-5                           | Dr.Ehrenstorfer | 7.67            | <u>689→158.1</u><br>689→544       | 100                               | 42<br>28                |          |
| Roxithromycin           |                                   | RTM                                               | 80214-83-1                          | Dr.Ehrenstorfer | 7.63            | <u>837.8→158.1</u><br>837.8→679.8 | 102                               | 47<br>29                |          |
| Tylosin                 |                                   | TYL                                               | 1401-69-0                           | Dr.Ehrenstorfer | 7.26            | <u>916.7→174.3</u><br>916.7→772.4 | 141                               | 55<br>41                |          |

| Class                              | Compound                            | Abbr               | CAS        | Supplier        | R.T.<br>(min) | MRM-transitions    | Fragmentor<br>(V) | CE <sup>d</sup><br>(eV) |
|------------------------------------|-------------------------------------|--------------------|------------|-----------------|---------------|--------------------|-------------------|-------------------------|
| <b>ionophores</b>                  |                                     | IPs                |            |                 |               |                    |                   |                         |
|                                    | Salinomycin                         | SAL                | 53003-10-4 | Dr.Ehrenstorfer | 9.99          | <u>773.6→431.4</u> | 160               | 68                      |
|                                    |                                     |                    |            |                 |               | 773.6→265.2        | 160               | 70                      |
|                                    | Narasin                             | NAR                | 55134-13-9 | TRC             | 10.2          | <u>787.7→431.6</u> | 175               | 69                      |
|                                    |                                     |                    |            |                 |               | 787.7→531.5        | 175               | 62                      |
|                                    | Monensin                            | MON                | 17090-79-8 | Dr.Ehrenstorfer | 10            | <u>693.5→675.7</u> | 170               | 52                      |
|                                    |                                     |                    |            |                 |               | 693.5→479.4        | 170               | 70                      |
| <b>aminocoumarins</b>              | Novobiocin                          | NOV                | 303-81-1   | Dr.Ehrenstorfer | 17.3          | <u>613.6→189.1</u> | 145               | 24                      |
|                                    |                                     |                    |            |                 |               | 613.6→133          |                   | 72                      |
| <b>lincosamides</b>                | Lincomycin                          | LIN                | 154-21-2   | Dr.Ehrenstorfer | 1.23          | <u>407.5→126.1</u> | 80                | 32                      |
|                                    |                                     |                    |            |                 |               | 407.5→359.1        | 80                | 26                      |
|                                    | Lincomycin-D <sub>3</sub> (IS)      | LIN-D <sub>3</sub> |            | TRC             | 1.23          | <u>410.6→129.1</u> | 80                | 30                      |
|                                    |                                     |                    |            |                 |               | 410.6→362.2        | 90                | 25                      |
| <b>ESI-</b>                        |                                     |                    |            |                 |               |                    |                   |                         |
| <b>chloramphenicol derivatives</b> |                                     |                    |            |                 |               |                    |                   |                         |
|                                    | Florfenicol                         | FF                 | 73231-34-2 | Dr.Ehrenstorfer | 2.92          | <u>355.7→335.8</u> | 60                | 12                      |
|                                    |                                     |                    |            |                 |               | 355.7→184.5        | 60                | 25                      |
|                                    | Chloramphenicol                     | CAP                | 154-75-2   | Dr.Ehrenstorfer | 3.63          | <u>320.8→152</u>   | 40                | 21                      |
|                                    |                                     |                    |            |                 |               | 320.8→256.8        | 40                | 15                      |
|                                    | Chloramphenicol-D <sub>5</sub> (IS) | CAP-D <sub>5</sub> |            | Dr.Ehrenstorfer | 3.61          | <u>325.7→156.8</u> | 55                | 23                      |
|                                    |                                     |                    |            |                 |               | 325.7→261.8        | 55                | 16                      |

<sup>a</sup> Abbreviation. <sup>b</sup> Retention time. <sup>c</sup> The selected ions for the antibiotic compounds were  $[M+H]^+$ , except ionophore compounds ( $[M+Na]^+$ ), florfenicol and chloramphenicol ( $[M-H]$ ). The underlined MRM transitions were used for quantification. <sup>d</sup> Collision energy. <sup>e</sup> Internal standard.

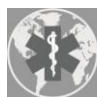

**Table S2.** Concentrations of antibiotics in ponds around Lake Guchenghu (ng/L).

| Analytes             | Fre. <sup>a</sup> (%) |        |        | Max <sup>b</sup> |        |        | Min <sup>c</sup> |        |        | Med <sup>d</sup> |        |        | Mean   |        |        |
|----------------------|-----------------------|--------|--------|------------------|--------|--------|------------------|--------|--------|------------------|--------|--------|--------|--------|--------|
|                      | spring                | summer | autumn | spring           | summer | autumn | spring           | summer | autumn | spring           | summer | autumn | spring | summer | autumn |
| SAs                  | 80                    | 100    | 100    | 79.9             | 672    | 431    | ND <sup>e</sup>  | 21.7   | 11.5   | 42.0             | 117    | 169    | 39.6   | 198    | 175    |
| SMX                  | 40                    | 20     | 20     | 17.5             | 21.7   | 6.40   | ND               | ND     | ND     | ND               | ND     | ND     | 6.00   | 4.34   | 1.28   |
| SDZ                  | 40                    | 80     | 80     | 63.2             | 654    | 430    | ND               | ND     | ND     | ND               | 115.2  | 169    | 24.5   | 187    | 169    |
| TMP                  | 60                    | 60     | 40     | 24.5             | 17.1   | 15.8   | ND               | ND     | ND     | 4.40             | 3.20   | ND     | 9.12   | 6.82   | 4.18   |
| MLs                  | 100                   | 100    | 100    | 405              | 2530   | 313    | 2.10             | 1.30   | 1.90   | 9.70             | 417    | 201    | 89.2   | 691    | 166    |
| RTM                  | 0                     | 0      | 40     | ND               | ND     | 0.20   | ND               | ND     | ND     | ND               | ND     | ND     | ND     | ND     | 0.05   |
| LCM                  | 20                    | 0      | 0      | 8.00             | ND     | ND     | ND               | ND     | ND     | ND               | ND     | ND     | 1.60   | ND     | ND     |
| CTM                  | 0                     | 60     | 20     | ND               | 76.2   | 0.05   | ND               | ND     | ND     | ND               | 3.20   | ND     | ND     | 17.1   | 0.01   |
| ETM-H <sub>2</sub> O | 100                   | 100    | 100    | 405              | 2450   | 312    | 1.10             | 1.30   | 1.90   | 2.10             | 411    | 201    | 82.8   | 674    | 165    |
| ATM                  | 20                    | 0      | 20     | 24.2             | ND     | 5.60   | ND               | ND     | ND     | ND               | ND     | ND     | 4.84   | ND     | 1.12   |
| CFX                  | 40                    | 0      | 0      | 46.5             | ND     | ND     | ND               | ND     | ND     | ND               | ND     | ND     | 16.8   | ND     | ND     |
| MON                  | 80                    | 80     | 60     | 326              | 328    | 2.45   | ND               | ND     | ND     | 3.60             | 6.6    | 0.4    | 102    | 82.5   | 0.72   |
| FF                   | 60                    | 100    | 60     | 161              | 248    | 261    | ND               | 21.0   | ND     | 84.0             | 141    | 56.0   | 78.0   | 138    | 81.2   |
| LIN                  | 80                    | 80     | 80     | 4.40             | 2.80   | 2.30   | ND               | ND     | ND     | 1.40             | 1.90   | 0.80   | 2.02   | 1.58   | 0.94   |
| ALL                  | 100                   | 100    | 100    | 558              | 3520   | 1000   | 148              | 190    | 14.5   | 365              | 686    | 429    | 328    | 1110   | 423    |

a Frequency of detection of each antibiotic in all surface water samples

b Maximum concentration

c Minimum concentration

d Median concentration

e Not detected



Table S3. Canonical correspondence analysis of the antibiotic concentrations and environmental parameters in crab ponds

| Axes                               | 1     | 2     | 3     | 4     | Total variance |
|------------------------------------|-------|-------|-------|-------|----------------|
| Eigenvalues :                      | 0.195 | 0.104 | 0.072 | 0.013 | 1.000          |
| Species-environment correlations : | 0.666 | 0.674 | 0.765 | 0.443 |                |
| Cumulative percentage variance     |       |       |       |       |                |
| of species data :                  | 19.5  | 29.9  | 37.2  | 38.5  |                |
| of species-environment relation :  | 50.8  | 77.8  | 96.5  | 100.0 |                |
| Sum of all eigenvalues             |       |       |       |       | 1.000          |
| Sum of all canonical eigenvalues   |       |       |       |       | 0.385          |

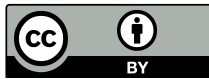

© 2018 by the authors. Submitted for possible open access publication under the terms and conditions of the Creative Commons Attribution (CC BY) license (<http://creativecommons.org/licenses/by/4.0/>).
